# Supplementary material for: Synthetic MUC1 breast cancer vaccine containing a Toll-like receptor 7 agonist exerts antitumor effects
Source: PubMed Central journal article supplement — Oncol Lett. 2020 Jun 19;20(3):2369–77. doi: 10.3892/ol.2020.11762 (PMC7400475; doi:10.3892/ol.2020.11762), 2020-06-19

Figure S1. Schematic illustration of the synthesis of the T7. (A) Procedure of the synthesis of T7. (B) Calculation of ratio of MUC1 peptide conjugated with T7. T7, Toll-like receptor 7 agonist; MUC1, mucin 1.

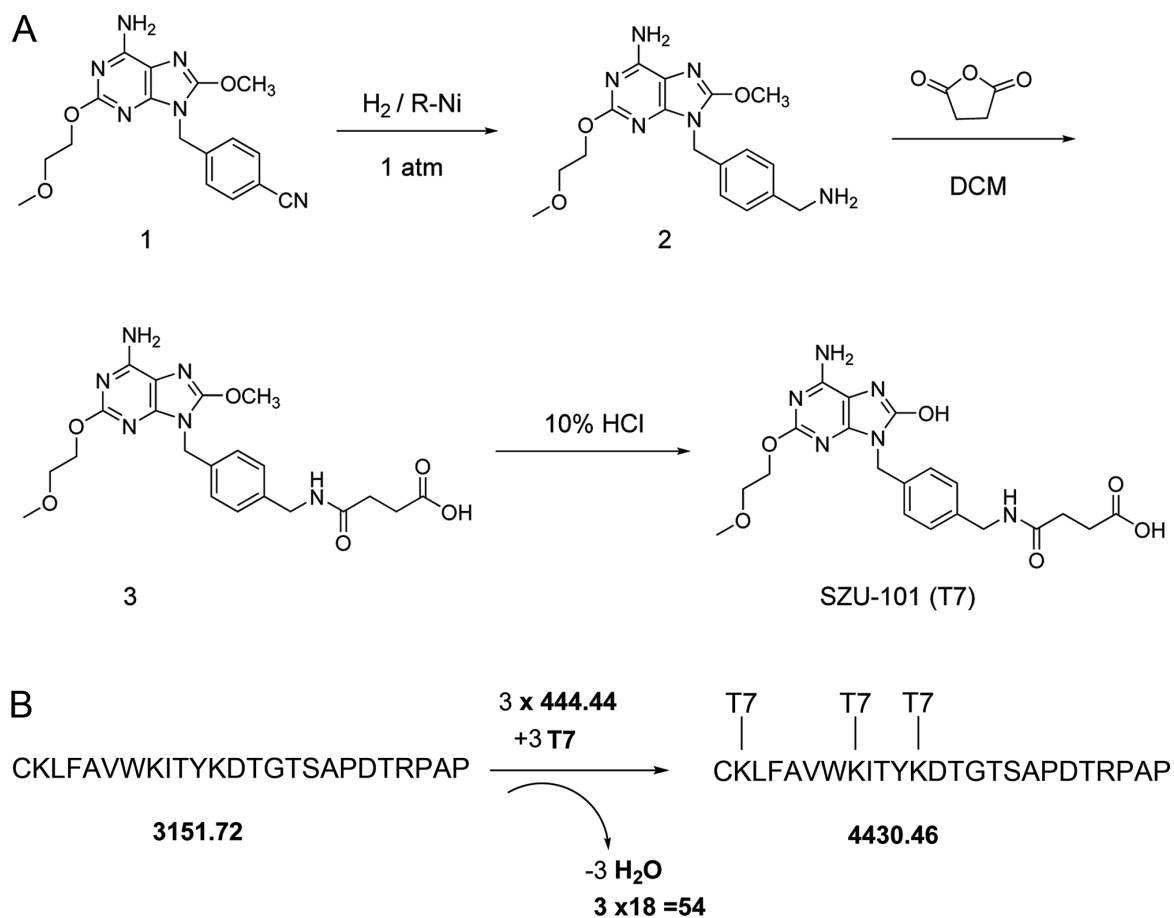

Figure S2. Structure confirmation of Toll-like receptor 7 agonist. (A)  $^{13}\text{C}$  NMR. (B)  $^1\text{H}$  NMR. NMR, nuclear magnetic resonance.

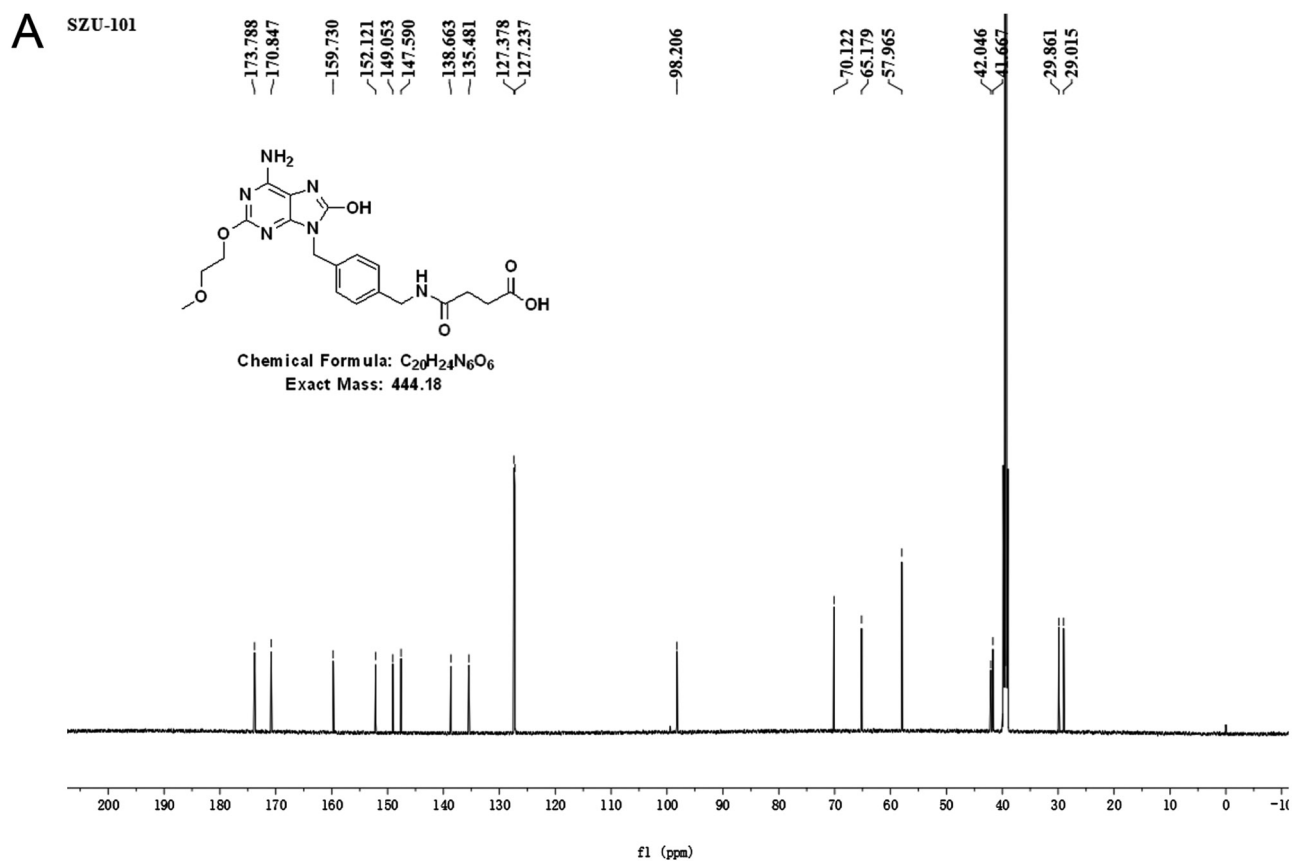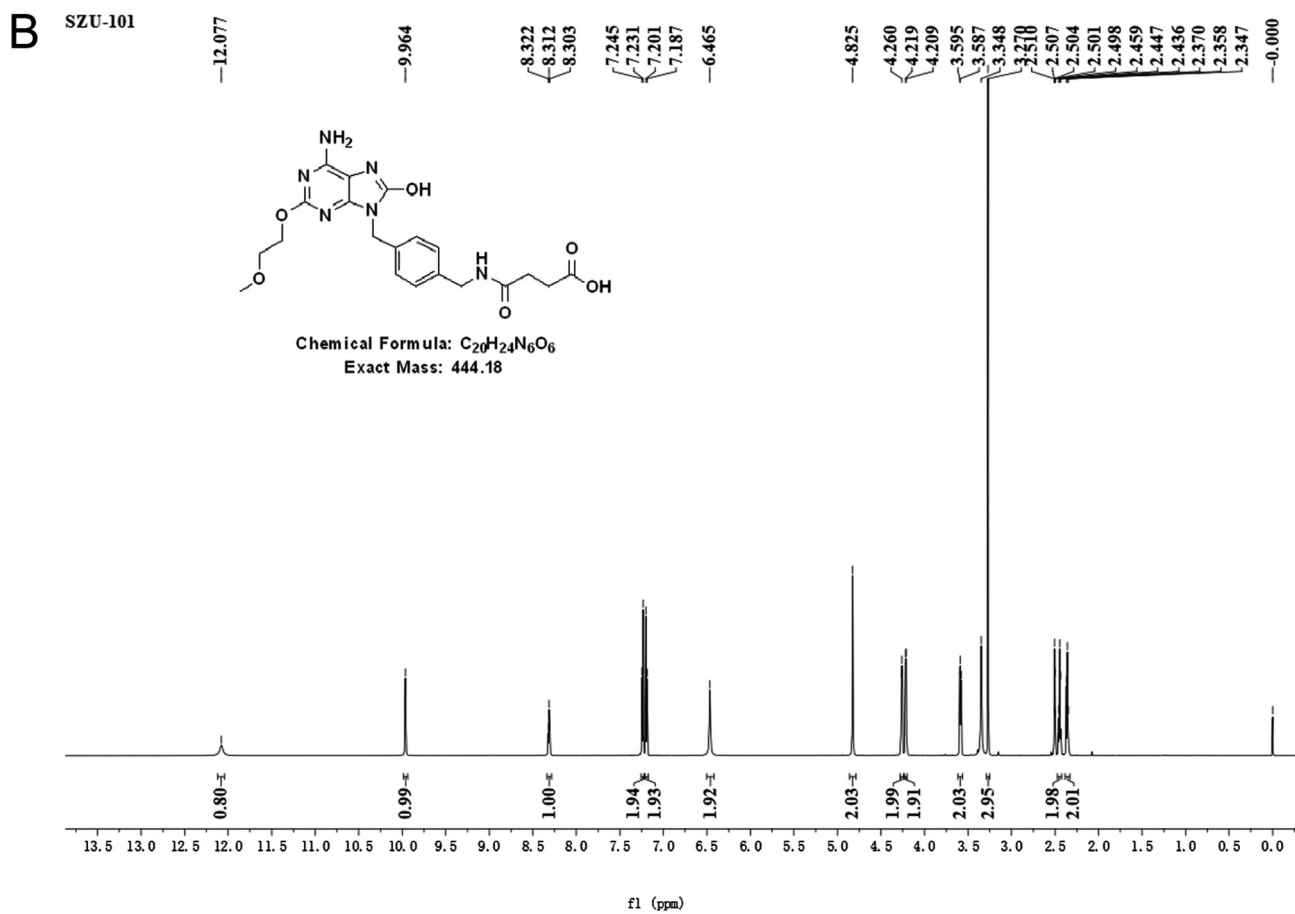

Figure S3. Certificate of analysis of T7-MUC1 conjugation by HYBIO. (A) Purity. (B) Molecular weight. T7, Toll-like receptor 7 agonist; MUC1, mucin 1.

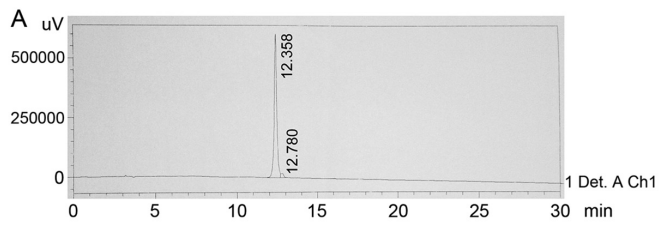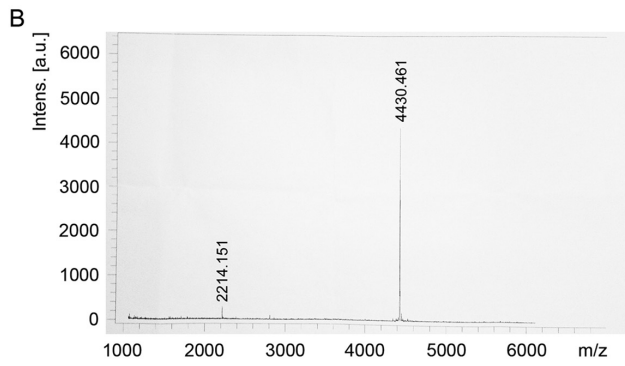

Figure S4. Representative flow cytometry plots of (A) CD3<sup>+</sup>/CD4<sup>+</sup> and (B) CD3<sup>+</sup>/CD8<sup>+</sup> T cells in splenocytes. T7, Toll-like receptor 7 agonist; MUC1, mucin 1.

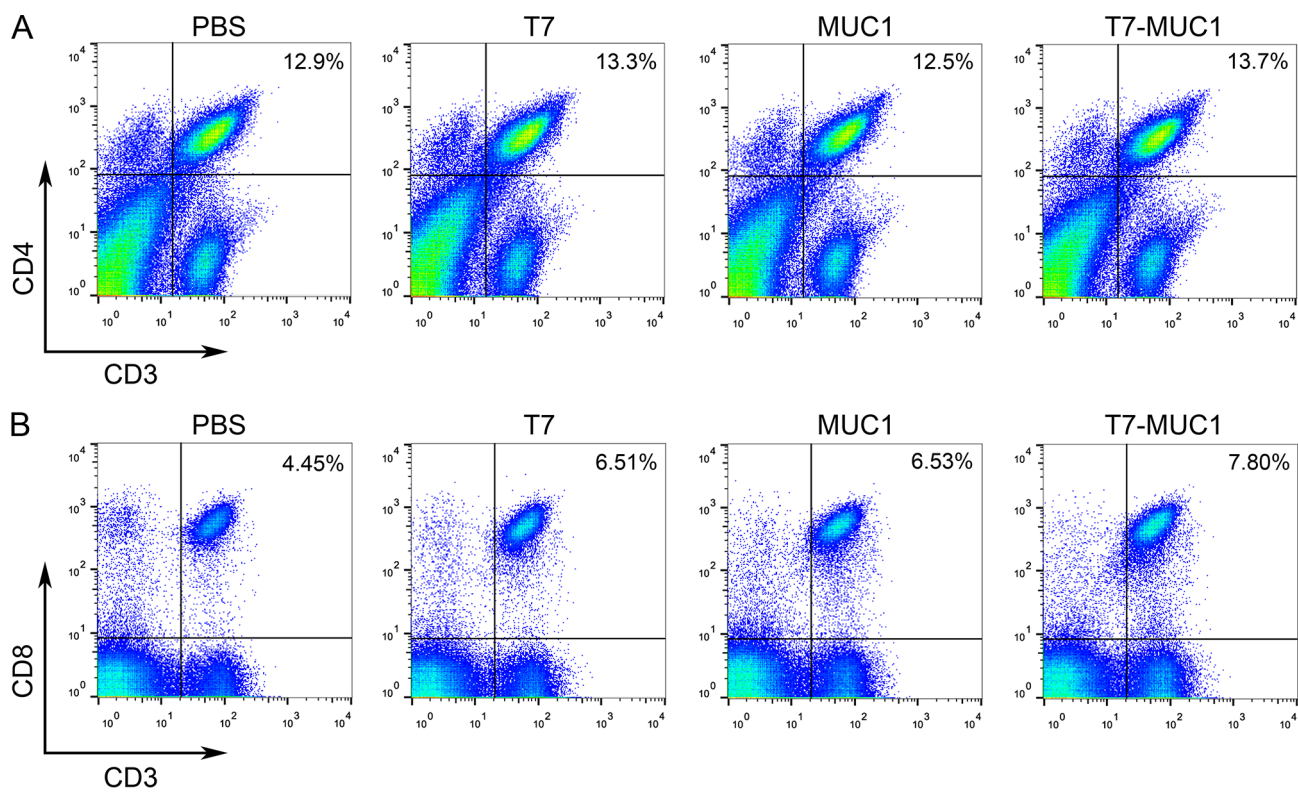

Supplement: Supplementary_Data.pdf [file Supplementary_Data.pdf]
